# Supplementary material
Source: PubMed Central journal article supplement (PMC2883652)

A

|                  |                                                          |
|------------------|----------------------------------------------------------|
| <b>A79-pS82</b>  | <b>S-E-A<sub>79</sub>-T-D-pS<sub>82</sub>-G-F-C-L-D</b>  |
| <b>pS79-pS82</b> | <b>S-E-pS<sub>79</sub>-T-D-pS<sub>82</sub>-G-F-C-L-D</b> |
| <b>S79-pS82</b>  | <b>S-E-S<sub>79</sub>-T-D-pS<sub>82</sub>-G-F-C-L-D</b>  |
| <b>S79-S82</b>   | <b>S-E-S<sub>79</sub>-T-D-S<sub>82</sub>-G-F-C-L-D</b>   |

B

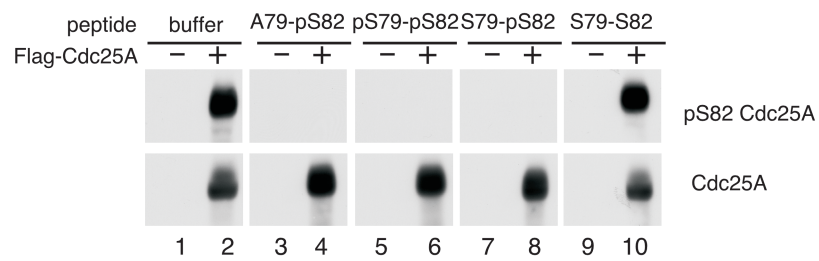

Supplement: NIHMS182469-supplement-2.pdf [file NIHMS182469-supplement-2.pdf]
