# Supplementary material
Source: PubMed Central journal article supplement (PMC2883652)

A

|                  |                                                          |
|------------------|----------------------------------------------------------|
| <b>A76-pS79</b>  | <b>G-A<sub>76</sub>-S-E-pS<sub>79</sub>-T-D-S-G-F-C</b>  |
| <b>pS76-pS79</b> | <b>G-pS<sub>76</sub>-S-E-pS<sub>79</sub>-T-D-S-G-F-C</b> |
| <b>S76-pS79</b>  | <b>G-S<sub>76</sub>-S-E-pS<sub>79</sub>-T-D-S-G-F-C</b>  |
| <b>S76-S79</b>   | <b>G-S<sub>76</sub>-S-E-S<sub>79</sub>-T-D-S-G-F-C</b>   |

B

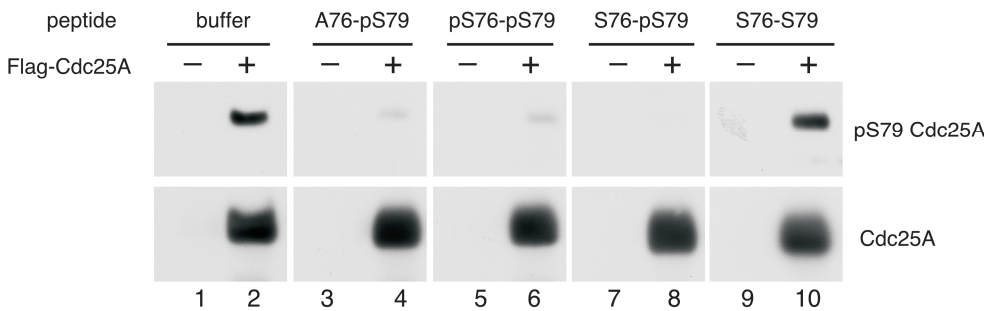

Supplement: NIHMS182469-supplement-3.pdf [file NIHMS182469-supplement-3.pdf]
