# Supplementary material
Source: PubMed Central journal article supplement (PMC2883652)
Supplement: NIHMS182469-supplement-6.pdf [file NIHMS182469-supplement-6.pdf]

|                                      | <b><u>SSESTDSG</u></b>                | <b><u>DDG<math>\phi</math>XD</u></b> |
|--------------------------------------|---------------------------------------|--------------------------------------|
| Human                                | 76 79 82<br><u>SSESTDSGFCLDSP</u>     | 215 220<br><u>DDGFVD</u>             |
| Chimpanzee                           | <u>SSESTDSGFCLDSP</u>                 | <u>DDGFVD</u>                        |
| Cow                                  | <u>SSESTDSGFCLDSP</u>                 | <u>DDGFMD</u>                        |
| Rat                                  | <u>SSESTDSGFCLDSP</u>                 | <u>DDGFID</u>                        |
| Mouse                                | <u>SSESTDSGFCLDSP</u>                 | <u>DDGFID</u>                        |
| Dog                                  | <u>SSESTDSGFCLDSP</u>                 | <u>DDGFMD</u>                        |
| Chicken                              | <u>SSESTDSGCALDLP</u>                 | DDGFLE <sup>*</sup>                  |
| Horse                                | <u>SSESTDSGFCLDSP</u>                 | <u>DDGFMD</u>                        |
| <i>Xenopus (Silurana) tropicalis</i> | <sup>*</sup><br><u>SSESMDAGLCLDSP</u> | <u>DDGFLD</u>                        |
| <i>Xenopus laevis</i>                | <sup>*</sup><br><u>SSESMDGGLCLDSP</u> | <u>DDGFLD</u>                        |
