# Supplementary material
Source: PubMed Central journal article supplement (PMC2883652)

Supplemental Fig. 3  
Honaker and Piwnica-Worms

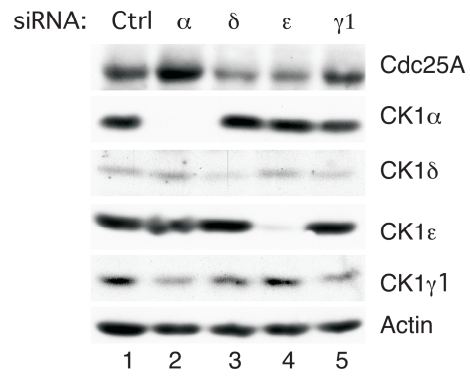

Supplement: NIHMS182469-supplement-4.pdf [file NIHMS182469-supplement-4.pdf]

Supplemental Fig. 4  
Honaker and Piwnica-Worms

A

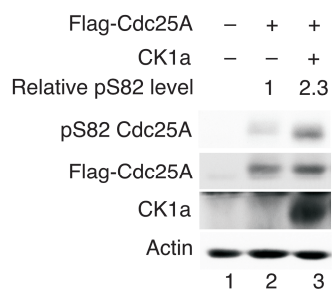

B

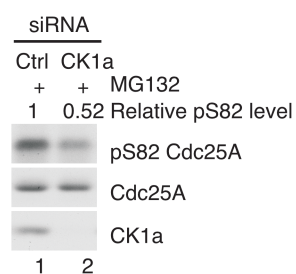

C

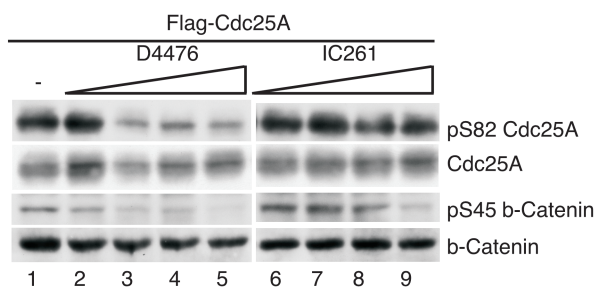

D

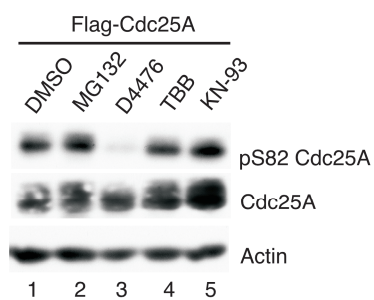

Supplement: NIHMS182469-supplement-5.pdf [file NIHMS182469-supplement-5.pdf]
